# Supplementary material
Source: Research Square preprint supplement (doi:10.21203/rs.3.rs-9449109/v1)
Supplement: Supplementary file 1 [file 0435780cf4f715564121c364.docx]

# Supplementary information

Table S1. Demographic and clinical information of participants

| Hospital | Sex | Age | Site of lesion(s) | CL phenotype | Lesion duration (months between first lesion appearing and admission) | Allopathic treatment type (reported at day 90) | Clinician-rated outcome at day 90 | Patient-reported outcome at day 90 |
| --- | --- | --- | --- | --- | --- | --- | --- | --- |
| ALERT | F | 18 | nose | LCL | 10 | IM-SSG (28 days) & 4 rounds of cryotherapy | substantial improvement | better |
| ALERT | M | 19 | nose | LCL | 12 | IM-SSG (28 days) & 2 rounds of cryotherapy | cure | better |
| ALERT | M | 40 | nose | MCL | 144 | IM-SSG (56 days) | substantial improvement | better |
| ALERT | F | 18 | nose | LCL | 6 | IM-SSG (28 days) & 5 rounds of cryotherapy | cure | better |
| ALERT | M | 50 | nose, mucosal | N/A | N/A | N/A | N/A | N/A |
| ALERT | M | 51 | nose | N/A | N/A | N/A | N/A | N/A |
| ALERT | F | 45 | hand, forehead, nose, legs | DCL | 24 | IM-SSG (42 days) & paromomycin ointment (10 days) | minor improvement | somewhat better |
| ALERT | F | 18 | nose | MCL | 120 | N/A | N/A | N/A |
| ALERT | F | 53 | nose, cheek | N/A | N/A | N/A | N/A | N/A |
| ALERT | M | 18 | cheek | LCL | 12 | IM-SSG (28 days) & 4 rounds of cryotherapy | substantial improvement | better |
| BMGH | F | 47 | nose | LCL | 18 | IL-SSG (4 rounds) | substantial improvement | better |
| BMGH | M | 45 | nose, lip, cheek | MCL | 48 | IM-SSG (56 days) & oral allopurinol (56 days) | minor improvement | better |
| BMGH | M | 40 | lip | MCL | 8 | IM-SSG (28 days), oral allopurinol (28 days) & IM-paromomycin (14 days) | substantial improvement | better |
| BMGH | M | 20 | oral mucosal | MCL | 24 | IM-SSG (28 days) & oral allopurinol (28 days) | substantial improvement | better |
| BMGH | M | 24 | leg | LCL | 36 | N/A | N/A | N/A |
| BMGH | M | 52 | wrist, finger/ hand | LCL | 12 | IM-SSG (28 days) & oral allopurinol (28 days) | substantial improvement | better |
| BMGH | F | 42 | nose, cheek, ear | MCL | 8 | IM-SSG (28 days) & oral allopurinol (28 days) | substantial improvement | better |
| BMGH | M | 64 | forehead, nose | MCL | 16 | IM-SSG (28 days) & oral allopurinol (28 days) | substantial improvement | better |
| BMGH | F | 32 | cheek, arm | LCL | 8 | IM-paromomycin (28 days) & oral allopurinol (28 days) | minor improvement | same |
| BMGH | M | 18 | lip | MCL | 4 | IM-paromomycin (28 days) & oral allopurinol (28 days) | substantial improvement | somewhat better |
| BMGH | M | 25 | arm | LCL | 23 | IM-SSG (28 days) & oral allopurinol (28 days) | substantial improvement | somewhat better |
| BMGH | M | 50 | nose | MCL | 36 | IM-paromomycin (28 days) & oral allopurinol (28 days) | cure | better |

- Clinician-rated outcome scale: worse, no change, minor improvement, substantial improvement, or cure
- Patient-reported treatment outcome: worse, somewhat worse, same, somewhat better, or better

ALERT: ALERT Comprehensive Specialized Hospital

BMGH: Boru Meda General Hospital

CL: cutaneous leishmaniasis

DCL: diffuse cutaneous leishmaniasis

IM-SSG: intramuscular sodium stibogluconate

IM-paromomycin: intramuscular paromomycin

LCL: localized cutaneous leishmaniasis

MCL: mucocutaneous leishmaniasis

N/A: not available
