# Supplementary material
Source: Research Square preprint supplement (doi:10.21203/rs.3.rs-9449109/v1)
Supplement: Supplementary file 2 [file 841ec5b80323eb36c8ac0936.pdf]

## Supplementary file S2: In-depth Interview Guide

|                                                                                       |                                                                                                                                                                                                                                                                                                                                                                                                                                                                                                                                                                                                                                                                                                                                                                                                                                                                                                                                                                                                                                                            |
|---------------------------------------------------------------------------------------|------------------------------------------------------------------------------------------------------------------------------------------------------------------------------------------------------------------------------------------------------------------------------------------------------------------------------------------------------------------------------------------------------------------------------------------------------------------------------------------------------------------------------------------------------------------------------------------------------------------------------------------------------------------------------------------------------------------------------------------------------------------------------------------------------------------------------------------------------------------------------------------------------------------------------------------------------------------------------------------------------------------------------------------------------------|
| <b>Target participant group:</b><br>- Adult patients with cutaneous Leshmaniasis (CL) |                                                                                                                                                                                                                                                                                                                                                                                                                                                                                                                                                                                                                                                                                                                                                                                                                                                                                                                                                                                                                                                            |
| <b>Domains</b>                                                                        | <b>Questions</b>                                                                                                                                                                                                                                                                                                                                                                                                                                                                                                                                                                                                                                                                                                                                                                                                                                                                                                                                                                                                                                           |
| Introduction/rapport                                                                  | <ul style="list-style-type: none"> <li>• Introduce yourself (where you are from, the purpose of your visit – explain the purpose of the study and what it means to the patients)</li> <li>• Ask for participants to introduce themselves (Name, age, residence, education level, occupation, marital status)</li> </ul>                                                                                                                                                                                                                                                                                                                                                                                                                                                                                                                                                                                                                                                                                                                                    |
| Making sense of illness and care seeking                                              | <ul style="list-style-type: none"> <li>• What do people in your community call the skin condition you have? When did it start? How it happened and progressed?</li> <li>• Please tell me about the location and the number of lesions that you have on your body parts.</li> <li>• What were the signs and symptoms of the CL you have experienced so far.</li> <li>• What did you do when you realized you got CL?</li> <li>• Please tell me, what treatment options did you tried before coming to this hospital? (probe: traditional treatments, religious healing practices, private clinic or other health facilities)</li> <li>• How do you describe the effectiveness of treatments you have tried before this facility? (Probe: traditional, religious healing practices, private clinic or other health facilities)</li> <li>• What motivated you to visit this hospital?</li> <li>• How long did it take for you to come here from the time you made the decision?</li> <li>• What enabled or constrained you to visit this hospital?</li> </ul> |
| Experiences of hospital care                                                          | <ul style="list-style-type: none"> <li>• Please tell me about your journey to visit this hospital.</li> <li>• What were your experiences in relation to examinations/ tests before you get admitted to the hospital?</li> <li>• what did you feel when you know you had CL?</li> <li>• Tell me the procedure how you were admitted to this hospital.</li> <li>• What treatment related concerns did you have?</li> </ul>                                                                                                                                                                                                                                                                                                                                                                                                                                                                                                                                                                                                                                   |

|                                   |                                                                                                                                                                                                                                                                                                                                                                                                                                                                                                                       |
|-----------------------------------|-----------------------------------------------------------------------------------------------------------------------------------------------------------------------------------------------------------------------------------------------------------------------------------------------------------------------------------------------------------------------------------------------------------------------------------------------------------------------------------------------------------------------|
|                                   | <ul style="list-style-type: none"> <li>• Help me understand the types of treatments you have received since you were admitted here?</li> <li>• How do you feel when you take the medicines?</li> <li>• What challenging experience have you had while receiving treatment for CL here in this hospital?</li> <li>• What did you like about CL care or the hospital environment?</li> <li>• How do you describe your progress or outcomes of your treatment from the day you started care in this hospital?</li> </ul> |
| Relationships within the hospital | <ul style="list-style-type: none"> <li>• How do you describe the way healthcare workers provide services?</li> <li>• How your relationships with healthcare workers affect your treatment experience or outcomes?</li> <li>• How do you interact with other patients, caregivers or people in this hospital?</li> <li>• How your relationships with other people in the hospital affect your treatment experience?</li> </ul>                                                                                         |
| Any additional insights           | <ul style="list-style-type: none"> <li>• What additional insights do you have regarding your experience with CL care other than we have discussed?</li> <li>• What do you suggest that may need to improve in the future?</li> </ul>                                                                                                                                                                                                                                                                                  |
